# Supplementary material
Source: PubMed Central journal article supplement (PMC3257897)
Supplement: mmc1.pdf [file mmc1.pdf]

**The American Journal of Human Genetics, Volume 90**

**Supplemental Data**

**De Novo and Inherited Mutations in *COL4A2*, Encoding  
the Type IV Collagen  $\alpha$ 2 Chain Cause Porencephaly**

**Yuriko Yoneda, Kazuhiro Haginoya, Hiroshi Arai, Shigeo Yamaoka, Yoshinori Tsurusaki, Hiroshi Doi, Noriko Miyake, Kenji Yokochi, Hitoshi Osaka, Mitsuhiro Kato, Naomichi Matsumoto, and Hiroto Saito**

**Table S1. Primers and PCR Conditions**

| Exon   | Forward primer (5'>3')      | Reverse primer (5'>3')      | Product size (bp) | PCR conditions  |
|--------|-----------------------------|-----------------------------|-------------------|-----------------|
| Ex2    | ATGGGCTGCCTCCCTCATCCT       | GAGAGTTACACCGAAGGGTCCATGC   | 202               | KOD-FX<br>2step |
| Ex3    | GCATGGACCCTTCGGTGTAACCTCTC  | CCACTCAAACGTCCCAACCACTCTC   | 198               | KOD-FX<br>2step |
| Ex4    | TTGGAAGGATTCTCAACAGATG      | AGCGAGGCATGACTGTATGA        | 230               | HotStar         |
| Ex5&6  | TCGTGGAAATTGAACCTTTG        | CCTAGGATGCACGCAATGTT        | 344               | HotStar         |
| Ex7    | GCCGGGAACATGGCTTATGAGAATA   | GTTATGCTTCCGTTCTGGCCACAGT   | 332               | KOD-FX<br>2step |
| Ex8    | CTGCACCGAATGTTAATGGA        | GATTATGCCGCCATTCTAGG        | 269               | HotStar         |
| Ex9&10 | GGGCTGATCTGTTTGATATGC       | CCAGAGTGGGCACCTGTGT         | 343               | HotStar         |
| Ex11   | CAGAAACCTCCATGCATCCT        | CAAAACAAACCCACAAACACCT      | 230               | HotStar         |
| Ex12   | TTGCCGATAAATAGGCCTTG        | TTTCCTGGCTGAGAAATGCT        | 201               | HotStar         |
| Ex13   | TTTCCTTTCGATTTAAAGACAACCTGC | TGGAATGTGGTTGAATACAATTGAAGA | 233               | KOD-FX<br>3step |
| Ex14   | CATGTCATGAACCTGATTGA        | ATGAGAGACTGGCGGTGTG         | 231               | HotStar         |
| Ex15   | AGTCCTGGAGCAGAGGATGA        | AAACCAAACCAAACCGACAA        | 186               | HotStar         |
| Ex16   | CGTAGTCAAGCCCTCTGGAA        | TGAGATGCCAAGGCCTATTT        | 197               | HotStar         |
| Ex17   | TTTGGAGTTATACATCAGAGACAAAAA | GTGGGCGAGACACCATAAGT        | 192               | HotStar         |
| Ex18   | CTCGGGTTTCTTCTTTGGAA        | GCTCTGTGTCCCTAACAGGAG       | 223               | HotStar         |
| Ex19   | CTCATCAGGCCGCATACAG         | GACCTGAGTGCAGGTGCTTT        | 288               | HotStar         |
| Ex20   | TCTGGACACGAACACAAAGG        | CGGGCTTCATCTGAACATTA        | 277               | HotStar         |
| Ex21   | CCTGCATCTGTGGTTGTCTC        | GGGGATGGATTTCACCTTCT        | 199               | HotStar         |
| Ex22   | GCTAAGAGGAATGCGGAACA        | GGAGGCCTCAGAGTGTCTTG        | 260               | HotStar         |
| Ex23   | GCCAGCTGTGTGAGATGAAA        | GTCCCCGCTCACCTAGAAAG        | 270               | HotStar         |
| Ex24   | TCCAGAACAATCACAACCAAAGGTGA  | GGGTGTTTGGAGAACCTGAAGGATG   | 286               | KOD-FX<br>2step |
| Ex25   | GGAAGTCGAGGCGATCTTTA        | CAAAGGAAAGCGTGGAATGT        | 325               | HotStar         |
| Ex26   | CCCAGACGAGCCAGTAACTC        | TTATCCCACGCATACTGCAA        | 215               | HotStar         |
| Ex27   | TAGGATTGCTTGGGCTCATC        | TTTGTGCTGAGATGCTGGAC        | 235               | HotStar         |
| Ex28   | TTATCCTCGTGGAGCCTGAT        | CTCCAAGGACAAATGCAAA         | 300               | HotStar         |
| Ex29   | CCATGCTAACTGTGGTTTGG        | CACTGTGCATCTGGGATGG         | 314               | HotStar         |
| Ex30   | AGTGTGTGGAGGGAGATGCT        | GTGAGGACCCCACTCGTTTA        | 279               | HotStar         |
| Ex31   | TGTTTGTCCACCCTGTTTGA        | CCAGCAGAGCTGTCTCAGGT        | 291               | HotStar         |
| Ex32   | CGAAATGTTACGGAGACGTG        | TGCCACCAAGAAAGGGTAAG        | 297               | HotStar         |

|         |                           |                            |     |                   |
|---------|---------------------------|----------------------------|-----|-------------------|
| Ex33    | CAGGCCTTCACCTGTGTTCT      | GTCTCTGGGGACGGAGAAG        | 280 | HotStar Step down |
| Ex34    | CAGCACGTAGGACAGCAAAA      | GCTCACAGAACAAGGGGAGT       | 321 | HotStar           |
| Ex35    | ACAGCTAAGCAAACCGCCTA      | TCTGAATTGTGGACTCCCTGT      | 287 | HotStar           |
| Ex36    | TCCCAGTGGAAAGTCCTGTT      | TTGATCTGTTTGGCAAGTCG       | 205 | HotStar           |
| Ex37    | GAAGGAGCAGCAGTGTGGTT      | AATGTTGACCGCCTTTGTTC       | 285 | HotStar           |
| Ex38    | CCAGGACCTCACACACAG        | ACTCTGGGTCTGGGTGACCA       | 216 | HotStar           |
| Ex39    | GCTGTCCACACATGAAATAA      | ACACCTCTGCGTGGGACTC        | 314 | HotStar           |
| Ex40    | GCTGCCTCTGTTTCTTTGCT      | CTCTGGGTGGGTCTGGTTA        | 295 | HotStar           |
| Ex41    | GCACCTCCCATCACTGTCTC      | CTACATTAAGCGGGCCATTG       | 316 | HotStar           |
| Ex42    | AGAGACTGTCGCCTGAATGGGTGAC | GACGTTAGGGACACGAAAGTCTGTGG | 343 | KOD-FX 2step      |
| Ex43    | CTGGCCACAGTGAGAGGAG       | GACCCATGCCAGAGAGGAT        | 272 | HotStar Step down |
| Ex44    | ACTCGGAGCAAGAGAGTGGA      | GAACACAAGAGGACGCAATG       | 293 | HotStar           |
| Ex45    | CATTGCGTCCTTGTGTTC        | AGCACTAGGACCTGGGAAGG       | 248 | HotStar           |
| Ex46    | GGGCTGCTCTCTCTCTTT        | AACTTACCAGCCGTGGAGGGTTG    | 586 | KOD-FX 2step      |
| Ex47-1* | GGCCCTCCAGTAGGTGGCTAAACTC | GGCTGATGTAGGGCTTGATCTCGTC  | 310 | KOD-FX 2step      |
| Ex47-2* | TCCTGTACTGCAACCCTGGTGATGT | CAAAGGCAGCTGTCTTGCTGTGTC   | 317 | KOD-FX 2step      |
| Ex48    | CAGGCTGTGATTCTAACCTGTCC   | GAATAAGCACCAAAATGGCCCTTCC  | 341 | KOD-FX Step down  |

\*Exon 46 was sequenced in two parts.

PCR was cycled 35 times for each condition as follows:

HotStar, 94°C for 30 sec, 55 or 57°C (for exon 38) for 30 sec, and 72°C for 60 sec;

HotStar Step down, the annealing temperature was lowered by 1°C per cycle from 58°C to 54°C for the initial 5 cycles;

KOD-FX 2step, 98°C for 10 sec and 68°C for 30sec;

KOD-FX 3step, 98°C for 10 sec, 64°C for 30 sec, and 68°C for 30sec;

KOD-FX Step down, the annealing temperature was reduced by 2°C every 5 steps from 72°C to 68°C.

The following PCR amplification enzymes were used: for KOD-FX, KOD-FX DNA polymerase (Toyobo, Osaka, Japan); for HotStar, HotStarTaq (Qiagen).

**Table S2.** Predictions of the Pathogenicity of the *COL4A2* Mutations

| Patient | Mutation              | SIFT | PolyPhen                      | PolyPhen-2                   | Mutation taster    | Align GVGD |
|---------|-----------------------|------|-------------------------------|------------------------------|--------------------|------------|
| 1       | c.3455G>A<br>p.G1152D | 0.00 | probably<br>damaging<br>2.142 | probably<br>damaging<br>1.00 | Disease<br>causing | C65        |
| 2       | c.3110G>A<br>p.G1037E | 0.00 | probably<br>damaging<br>2.367 | probably<br>damaging<br>1.00 | Disease<br>causing | C65        |

For the predictions we used SIFT (<http://sift.jcvi.org/>),  
PolyPhen (<http://genetics.bwh.harvard.edu/pph/>),  
PolyPhen-2 (<http://genetics.bwh.harvard.edu/pph2/>),  
Mutation Taster (<http://neurocore.charite.de/MutationTaster/index.html>)  
and Align GVGD ([http://agvgd.iarc.fr/agvgd\\_input.php](http://agvgd.iarc.fr/agvgd_input.php))

SIFT, scores less than 0.05 indicate substitutions are considered to be intolerant;

PolyPhen, scores more than 2.0 are considered to be pathogenic;

PolyPhen-2, scores are evaluated from 0.000 (most probably benign) to 0.999 (most probably damaging);

Align GVGD, class scores are evaluated as Class C0 (less likely) to Class C65 (most likely).
